# Supplementary material for: Prediction study of prognostic nutrition index on the quality of life of patients with cervical cancer undergoing radiotherapy and chemotherapy
Source: PeerJ. 2023 May 19;11:e15442. doi: 10.7717/peerj.15442 (PMC10202106; doi:10.7717/peerj.15442)
Supplement: Supplemental Information 1 [file peerj-11-15442-s001.xlsx]

## Sheet: Sheet 1
ID	PNI	PNI_group	Age	Age_group	Nationality	Marriage	Education	Payment	Clinical_stage	Treatment	ECOG	Complication	Comorbidity	Pathological_type	BonePain	PhysicalFunctioning	RoleFunctioning	EmotionalFunctioning	CognitiveFunctioning	SocialFunctioning	QualityofLife	Fatigue	NauseaVomiting	Pain	Dyspnea	Sleeplessness	AppetiteLoss	Constipation	Diarrhea	FinancialDifficulties	OStime	OSstatus	ORRpatient	0RR
2	50	High PNI	58	≤60 years	Han-Nationality	Divorced	Primary or junior education	Self-pay	Stage IV	Concurrent chemoradiotherap	ECOG >2	Yes	Yes	Squamous cell carcinoma	Yes	7	0	58	50	17	17	0	0	17	0	100	0	0	33	0	12	0	1	CR
5	51	High PNI	57	≤60 years	Han-Nationality	Divorced	Primary or junior education	Other payments	Stage IV	Concurrent chemoradiotherap	ECOG ≤2	No	No	Squamous cell carcinoma	No	0	83	25	50	0	0	11	33	0	0	33	0	33	0	100	7	0	1	CR
10	49	High PNI	75	>60 years	Han-Nationality	Married	Senior or Higher professional education	Staff medical insurance	Stage II	Concurrent chemoradiotherap	ECOG >2	No	Yes	Squamous cell carcinoma	No	40	0	25	67	100	42	33	0	67	33	0	33	0	33	100	6	0	1	PR
13	51	High PNI	54	≤60 years	Han-Nationality	Married	Primary or junior education	Residents, new rural cooperative medical insurance	Stage III	Concurrent chemoradiotherap	ECOG >2	Yes	Yes	Squamous cell carcinoma	No	47	67	42	50	33	25	44	17	83	0	0	0	0	0	0	9	0	1	CR
16	50	High PNI	52	≤60 years	Han-Nationality	Married	University or postgraduate education	Staff medical insurance	Stage III	Palliative radiotherapy	ECOG >2	No	Yes	Squamous cell carcinoma	No	47	17	17	50	50	8	0	0	0	100	0	0	100	0	33	15	0	1	PR
18	50	High PNI	64	>60 years	non-Han-Nationality	Married	University or postgraduate education	Other payments	Stage IV	Palliative radiotherapy	ECOG >2	Yes	No	Adenosquamous carcinoma	Yes	47	17	33	83	33	42	22	50	0	0	0	0	67	0	33	12	1	0
20	49	High PNI	58	≤60 years	non-Han-Nationality	Married	Senior or Higher professional education	Residents, new rural cooperative medical insurance	Stage IV	Concurrent chemoradiotherap	ECOG ≤2	Yes	No	Squamous cell carcinoma	Yes	60	0	33	0	83	17	100	0	0	0	0	100	100	0	100	12	0	1	CR
23	51	High PNI	57	≤60 years	Han-Nationality	Married	Senior or Higher professional education	Other payments	Stage III	Palliative radiotherapy	ECOG >2	Yes	Yes	Squamous cell carcinoma	No	20	100	33	17	100	25	100	17	50	100	33	0	100	0	100	14	0	1	CR
24	51	High PNI	60	≤60 years	Han-Nationality	Married	Senior or Higher professional education	Other payments	Stage I	Postoperative radiotherapy and chemotherapy	ECOG ≤2	No	No	Squamous cell carcinoma	No	67	100	50	50	50	25	33	0	0	100	0	0	0	0	0	17	0	0
25	49	High PNI	65	>60 years	non-Han-Nationality	Married	Primary or junior education	Other payments	Stage II	Postoperative radiotherapy and chemotherapy	ECOG ≤2	No	Yes	Squamous cell carcinoma	No	33	83	42	0	83	25	78	17	33	100	67	100	33	0	0	5	0	0
30	52	High PNI	58	≤60 years	Han-Nationality	Divorced	Primary or junior education	Residents, new rural cooperative medical insurance	Stage IV	Concurrent chemoradiotherap	ECOG >2	Yes	No	Squamous cell carcinoma	No	20	17	17	67	17	25	33	33	0	100	67	0	100	0	0	24	1	1	PR
32	54	High PNI	60	≤60 years	Han-Nationality	Married	Primary or junior education	Residents, new rural cooperative medical insurance	Stage III	Concurrent chemoradiotherap	ECOG ≤2	No	No	Squamous cell carcinoma	No	67	33	100	17	50	67	44	33	50	100	0	33	0	0	0	14	0	1	CR
34	58	High PNI	58	≤60 years	Han-Nationality	Married	Senior or Higher professional education	Self-pay	Stage IV	Concurrent chemoradiotherap	ECOG ≤2	No	Yes	Adenocarcinoma	Yes	67	50	83	100	100	42	100	33	50	0	100	0	100	67	33	14	1	1	PR
35	52	High PNI	64	>60 years	non-Han-Nationality	Married	University or postgraduate education	Residents, new rural cooperative medical insurance	Stage III	Postoperative radiotherapy and chemotherapy	ECOG ≤2	No	No	Squamous cell carcinoma	No	73	33	83	17	33	50	56	17	50	33	33	0	67	0	100	13	0	0
38	50	High PNI	60	≤60 years	Han-Nationality	Divorced	Senior or Higher professional education	Residents, new rural cooperative medical insurance	Stage II	Palliative radiotherapy	ECOG >2	No	No	Squamous cell carcinoma	No	47	100	92	0	0	33	44	17	50	33	100	33	0	0	100	8	0	0
40	49	High PNI	67	>60 years	non-Han-Nationality	Unmarried	Primary or junior education	Other payments	Stage III	Concurrent chemoradiotherap	ECOG ≤2	No	No	Squamous cell carcinoma	No	27	0	75	67	67	100	67	17	100	100	0	100	0	100	0	11	0	1	CR
42	56	High PNI	46	≤60 years	Han-Nationality	Unmarried	University or postgraduate education	Staff medical insurance	Stage II	Postoperative radiotherapy	ECOG ≤2	No	Yes	Squamous cell carcinoma	No	60	100	42	67	50	50	100	0	50	100	33	33	100	0	33	20	0	0
44	50	High PNI	58	≤60 years	Han-Nationality	Married	University or postgraduate education	Residents, new rural cooperative medical insurance	Stage III	Concurrent chemoradiotherap	ECOG >2	No	No	Adenosquamous carcinoma	No	73	0	25	0	0	33	56	50	50	67	33	100	33	33	33	14	0	1	PR
45	52	High PNI	51	≤60 years	Han-Nationality	Divorced	Senior or Higher professional education	Staff medical insurance	Stage III	Concurrent chemoradiotherap	ECOG ≤2	No	Yes	Squamous cell carcinoma	No	73	33	33	67	67	42	78	17	100	0	100	33	33	0	100	24	0	1	CR
46	53	High PNI	57	≤60 years	Han-Nationality	Married	Senior or Higher professional education	Residents, new rural cooperative medical insurance	Stage II	Postoperative radiotherapy	ECOG ≤2	No	No	Adenocarcinoma	No	67	33	83	50	50	67	22	50	33	0	33	0	33	0	0	24	0	0
48	51	High PNI	59	≤60 years	non-Han-Nationality	Divorced	University or postgraduate education	Self-pay	Stage III	Postoperative radiotherapy	ECOG ≤2	No	No	Squamous cell carcinoma	No	53	100	92	83	83	17	100	100	33	33	0	0	100	100	100	1	0	0
49	53	High PNI	52	≤60 years	Han-Nationality	Married	Senior or Higher professional education	Residents, new rural cooperative medical insurance	Stage IV	Postoperative radiotherapy and chemotherapy	ECOG ≤2	No	Yes	Adenocarcinoma	No	53	83	58	83	0	58	44	50	17	33	100	33	100	0	33	20	0	0
50	52	High PNI	52	≤60 years	Han-Nationality	Married	Senior or Higher professional education	Residents, new rural cooperative medical insurance	Stage III	Postoperative radiotherapy and chemotherapy	ECOG ≤2	No	No	Squamous cell carcinoma	No	93	17	8	50	67	42	78	50	100	0	0	67	100	100	33	15	0	0
53	49	High PNI	58	≤60 years	non-Han-Nationality	Married	Senior or Higher professional education	Residents, new rural cooperative medical insurance	Stage IV	Concurrent chemoradiotherap	ECOG ≤2	Yes	No	Squamous cell carcinoma	Yes	73	17	33	100	17	83	56	50	33	67	100	33	100	33	0	3	0	1	PR
54	54	High PNI	57	≤60 years	Han-Nationality	Married	University or postgraduate education	Residents, new rural cooperative medical insurance	Stage III	Postoperative radiotherapy and chemotherapy	ECOG ≤2	No	Yes	Squamous cell carcinoma	No	60	100	67	50	100	67	44	100	83	0	100	0	100	100	0	7	0	0
56	54	High PNI	62	>60 years	Han-Nationality	Married	Senior or Higher professional education	Other payments	Stage II	Postoperative radiotherapy	ECOG ≤2	No	No	Squamous cell carcinoma	No	93	33	58	50	50	67	44	50	50	100	33	100	0	33	100	16	0	0
57	56	High PNI	71	>60 years	Han-Nationality	Married	Senior or Higher professional education	Self-pay	Stage I	Postoperative radiotherapy	ECOG ≤2	No	No	Squamous cell carcinoma	No	73	50	92	83	83	50	44	50	33	67	67	0	0	100	100	14	0	0
59	49	High PNI	72	>60 years	Han-Nationality	Married	Primary or junior education	Staff medical insurance	Stage III	Concurrent chemoradiotherap	ECOG >2	No	No	Squamous cell carcinoma	No	73	100	75	0	100	83	67	67	100	100	67	33	0	100	100	19	0	1	CR
60	51	High PNI	46	≤60 years	Han-Nationality	Married	Primary or junior education	Residents, new rural cooperative medical insurance	Stage IV	Postoperative radiotherapy	ECOG ≤2	No	Yes	Squamous cell carcinoma	No	60	67	33	83	50	50	100	83	100	100	100	0	100	100	100	22	1	0
63	52	High PNI	62	>60 years	non-Han-Nationality	Married	Senior or Higher professional education	Other payments	Stage III	Concurrent chemoradiotherap	ECOG >2	Yes	No	Squamous cell carcinoma	No	60	83	42	67	83	100	33	67	100	100	67	67	100	100	33	11	0	1	CR
64	56	High PNI	48	≤60 years	non-Han-Nationality	Married	Senior or Higher professional education	Residents, new rural cooperative medical insurance	Stage IV	Postoperative radiotherapy	ECOG ≤2	No	Yes	Squamous cell carcinoma	Yes	73	83	100	50	100	100	89	100	50	100	100	100	67	100	100	24	1	0
70	49	High PNI	65	>60 years	Han-Nationality	Married	Primary or junior education	Residents, new rural cooperative medical insurance	Stage II	Postoperative radiotherapy	ECOG ≤2	No	No	Squamous cell carcinoma	No	60	50	25	50	100	33	67	67	100	67	100	33	33	67	0	15	1	0
71	49	High PNI	63	>60 years	Han-Nationality	Married	Senior or Higher professional education	Staff medical insurance	Stage I	Concurrent chemoradiotherap	ECOG >2	No	No	Adenosquamous carcinoma	No	60	33	58	50	33	58	100	100	100	33	0	100	0	100	33	12	0	1	CR
72	59	High PNI	56	≤60 years	Han-Nationality	Divorced	Primary or junior education	Residents, new rural cooperative medical insurance	Stage II	Concurrent chemoradiotherap	ECOG ≤2	No	No	Squamous cell carcinoma	No	87	100	92	33	50	42	89	83	100	33	100	100	100	33	0	14	0	1	CR
73	50	High PNI	47	≤60 years	Han-Nationality	Married	Senior or Higher professional education	Staff medical insurance	Stage II	Postoperative radiotherapy and chemotherapy	ECOG ≤2	No	No	Squamous cell carcinoma	No	87	50	92	100	50	17	89	67	100	100	100	0	100	100	100	9	0	0
74	63	High PNI	67	>60 years	Han-Nationality	Married	Primary or junior education	Residents, new rural cooperative medical insurance	Stage III	Postoperative radiotherapy	ECOG ≤2	No	No	Adenocarcinoma	No	80	17	50	67	0	92	89	67	100	0	0	33	100	100	0	18	0	0
75	51	High PNI	66	>60 years	Han-Nationality	Married	University or postgraduate education	Residents, new rural cooperative medical insurance	Stage III	Concurrent chemoradiotherap	ECOG >2	No	No	Squamous cell carcinoma	No	33	100	100	83	17	33	78	100	100	100	33	0	100	100	100	6	0	1	CR
76	53	High PNI	56	≤60 years	Han-Nationality	Married	University or postgraduate education	Self-pay	Stage I	Concurrent chemoradiotherap	ECOG >2	No	No	Adenocarcinoma	No	73	83	67	50	100	75	78	67	100	100	100	33	100	100	100	19	0	1	PR
78	51	High PNI	47	≤60 years	Han-Nationality	Married	University or postgraduate education	Residents, new rural cooperative medical insurance	Stage II	Concurrent chemoradiotherap	ECOG >2	No	No	Adenocarcinoma	No	60	83	58	17	33	58	78	67	50	100	33	100	100	100	100	5	0	1	CR
79	49	High PNI	53	≤60 years	Han-Nationality	Divorced	Senior or Higher professional education	Residents, new rural cooperative medical insurance	Stage II	Concurrent chemoradiotherap	ECOG >2	Yes	No	Squamous cell carcinoma	No	53	33	75	0	83	42	67	83	67	0	33	67	33	100	100	13	0	1	CR
80	58	High PNI	53	≤60 years	Han-Nationality	Married	Senior or Higher professional education	Self-pay	Stage III	Postoperative radiotherapy and chemotherapy	ECOG ≤2	No	Yes	Squamous cell carcinoma	No	60	0	100	83	33	42	100	83	67	0	100	100	100	100	100	7	0	0
81	57	High PNI	54	≤60 years	Han-Nationality	Married	University or postgraduate education	Staff medical insurance	Stage III	Postoperative radiotherapy and chemotherapy	ECOG ≤2	No	No	Squamous cell carcinoma	No	100	83	58	83	83	100	11	100	50	100	0	100	33	33	33	24	0	0
83	56	High PNI	59	≤60 years	Han-Nationality	Married	Primary or junior education	Other payments	Stage III	Postoperative radiotherapy and chemotherapy	ECOG ≤2	No	No	Squamous cell carcinoma	No	67	100	100	0	100	33	78	67	67	100	0	100	33	100	0	13	0	0
84	55	High PNI	59	≤60 years	Han-Nationality	Married	Senior or Higher professional education	Self-pay	Stage III	Postoperative radiotherapy and chemotherapy	ECOG ≤2	Yes	Yes	Squamous cell carcinoma	No	67	67	83	83	33	67	56	100	50	100	100	100	100	100	100	19	0	0
87	55	High PNI	47	≤60 years	non-Han-Nationality	Married	Primary or junior education	Residents, new rural cooperative medical insurance	Stage I	Concurrent chemoradiotherap	ECOG ≤2	No	No	Squamous cell carcinoma	No	87	33	58	100	83	50	100	100	100	100	33	33	0	100	100	12	0	1	PR
90	57	High PNI	50	≤60 years	non-Han-Nationality	Married	Senior or Higher professional education	Residents, new rural cooperative medical insurance	Stage II	Postoperative radiotherapy and chemotherapy	ECOG ≤2	No	No	Adenocarcinoma	No	93	67	100	83	83	100	100	67	50	67	100	100	100	100	33	19	0	0
91	56	High PNI	62	>60 years	Han-Nationality	Married	Senior or Higher professional education	Other payments	Stage III	Postoperative radiotherapy	ECOG ≤2	Yes	No	Squamous cell carcinoma	No	87	100	58	67	100	100	100	100	100	100	67	100	33	100	33	13	0	0
92	64	High PNI	51	≤60 years	non-Han-Nationality	Married	Senior or Higher professional education	Staff medical insurance	Stage II	Postoperative radiotherapy	ECOG ≤2	No	No	Squamous cell carcinoma	No	93	100	50	100	83	58	78	100	50	100	100	100	100	33	100	24	0	0
93	51	High PNI	54	≤60 years	Han-Nationality	Divorced	Senior or Higher professional education	Staff medical insurance	Stage I	Postoperative radiotherapy and chemotherapy	ECOG ≤2	No	No	Squamous cell carcinoma	No	93	100	42	100	100	50	89	67	100	100	100	0	100	100	100	11	0	0
94	57	High PNI	49	≤60 years	Han-Nationality	Married	Senior or Higher professional education	Residents, new rural cooperative medical insurance	Stage III	Postoperative radiotherapy	ECOG ≤2	No	No	Squamous cell carcinoma	No	100	100	100	100	83	50	56	83	83	67	100	100	100	100	100	17	0	0
95	53	High PNI	59	≤60 years	Han-Nationality	Married	University or postgraduate education	Residents, new rural cooperative medical insurance	Stage III	Postoperative radiotherapy and chemotherapy	ECOG ≤2	No	No	Squamous cell carcinoma	No	100	67	25	100	100	75	67	83	83	33	100	100	100	100	100	18	0	0
96	50	High PNI	57	≤60 years	Han-Nationality	Married	Senior or Higher professional education	Other payments	Stage III	Palliative radiotherapy	ECOG >2	No	No	Squamous cell carcinoma	No	67	0	67	67	100	92	0	100	67	100	100	100	100	100	0	11	1	1	SD
97	52	High PNI	47	≤60 years	Han-Nationality	Married	Senior or Higher professional education	Staff medical insurance	Stage II	Concurrent chemoradiotherap	ECOG >2	No	No	Squamous cell carcinoma	No	80	100	75	17	67	100	56	100	100	0	33	67	100	100	33	12	0	1	CR
98	52	High PNI	64	>60 years	non-Han-Nationality	Married	University or postgraduate education	Staff medical insurance	Stage III	Postoperative radiotherapy and chemotherapy	ECOG ≤2	No	Yes	Squamous cell carcinoma	No	93	0	83	100	100	75	100	100	100	0	100	0	0	100	100	8	0	0
99	54	High PNI	63	>60 years	Han-Nationality	Married	Primary or junior education	Staff medical insurance	Stage I	Concurrent chemoradiotherap	ECOG >2	No	No	Squamous cell carcinoma	No	100	83	83	100	100	92	100	100	50	100	100	0	100	100	100	24	0	1	CR
101	54	High PNI	57	≤60 years	Han-Nationality	Married	Primary or junior education	Other payments	Stage II	Palliative radiotherapy	ECOG >2	Yes	No	Squamous cell carcinoma	No	73	67	92	83	83	67	100	67	100	100	100	33	100	100	33	11	1	0
102	57	High PNI	65	>60 years	Han-Nationality	Married	Senior or Higher professional education	Self-pay	Stage I	Postoperative radiotherapy	ECOG ≤2	No	Yes	Squamous cell carcinoma	No	100	100	75	100	100	92	78	100	50	33	0	100	100	100	100	23	0	0
103	51	High PNI	58	≤60 years	Han-Nationality	Married	Senior or Higher professional education	Residents, new rural cooperative medical insurance	Stage IV	Postoperative radiotherapy	ECOG ≤2	No	Yes	Squamous cell carcinoma	Yes	60	83	83	83	50	92	33	100	100	100	100	100	0	100	100	21	0	0
105	49	High PNI	52	≤60 years	Han-Nationality	Married	University or postgraduate education	Staff medical insurance	Stage III	Postoperative radiotherapy	ECOG ≤2	No	No	Squamous cell carcinoma	No	93	67	100	100	67	83	67	100	83	100	100	100	100	100	33	7	0	0
106	59	High PNI	63	>60 years	Han-Nationality	Married	Senior or Higher professional education	Staff medical insurance	Stage II	Concurrent chemoradiotherap	ECOG >2	No	No	Squamous cell carcinoma	No	100	100	50	100	100	92	67	100	67	100	100	100	100	100	100	16	0	1	CR
107	50	High PNI	59	≤60 years	Han-Nationality	Unmarried	Senior or Higher professional education	Residents, new rural cooperative medical insurance	Stage I	Postoperative radiotherapy and chemotherapy	ECOG ≤2	No	No	Squamous cell carcinoma	No	47	67	50	83	100	100	89	100	67	0	100	100	100	100	100	6	0	0
108	51	High PNI	53	≤60 years	Han-Nationality	Married	Senior or Higher professional education	Residents, new rural cooperative medical insurance	Stage I	Postoperative radiotherapy and chemotherapy	ECOG ≤2	Yes	No	Squamous cell carcinoma	No	60	100	75	100	100	100	100	100	100	67	100	100	33	100	33	19	0	0
109	53	High PNI	53	≤60 years	non-Han-Nationality	Married	Senior or Higher professional education	Self-pay	Stage II	Postoperative radiotherapy and chemotherapy	ECOG ≤2	No	No	Squamous cell carcinoma	No	100	100	100	100	100	50	56	100	100	67	100	100	67	100	33	24	0	0
110	49	High PNI	62	>60 years	non-Han-Nationality	Married	University or postgraduate education	Other payments	Stage IV	Postoperative radiotherapy	ECOG ≤2	No	No	Squamous cell carcinoma	Yes	80	50	83	67	50	83	56	67	83	33	100	100	100	100	100	22	0	0
112	51	High PNI	63	>60 years	non-Han-Nationality	Married	University or postgraduate education	Staff medical insurance	Stage IV	Postoperative radiotherapy	ECOG ≤2	No	No	Squamous cell carcinoma	No	60	100	75	17	50	100	100	100	100	100	100	100	100	100	100	10	1	0
113	55	High PNI	52	≤60 years	Han-Nationality	Married	Senior or Higher professional education	Staff medical insurance	Stage IV	Postoperative radiotherapy	ECOG ≤2	No	No	Adenocarcinoma	No	80	83	83	100	83	92	100	100	83	100	67	100	100	100	100	15	1	0
114	57	High PNI	70	>60 years	Han-Nationality	Unmarried	Senior or Higher professional education	Staff medical insurance	Stage I	Postoperative radiotherapy	ECOG ≤2	No	Yes	Squamous cell carcinoma	No	100	100	75	100	100	67	89	100	100	100	100	100	100	100	100	12	0	0
115	55	High PNI	55	≤60 years	Han-Nationality	Married	Primary or junior education	Other payments	Stage II	Postoperative radiotherapy	ECOG ≤2	No	No	Squamous cell carcinoma	No	100	100	92	83	100	58	100	67	67	100	100	100	33	100	33	16	0	0
117	52	High PNI	45	≤60 years	non-Han-Nationality	Married	Primary or junior education	Staff medical insurance	Stage IV	Concurrent chemoradiotherap	ECOG ≤2	No	No	Adenocarcinoma	Yes	100	100	50	100	100	100	100	100	83	100	100	100	100	100	100	21	0	1	CR
119	54	High PNI	54	≤60 years	Han-Nationality	Married	Senior or Higher professional education	Residents, new rural cooperative medical insurance	Stage II	Postoperative radiotherapy	ECOG ≤2	Yes	Yes	Squamous cell carcinoma	No	100	100	75	100	50	67	33	100	100	100	100	67	100	100	100	6	0	0
120	50	High PNI	53	≤60 years	Han-Nationality	Married	University or postgraduate education	Staff medical insurance	Stage I	Postoperative radiotherapy	ECOG ≤2	No	No	Squamous cell carcinoma	No	100	100	100	100	33	83	100	83	83	33	100	100	100	100	100	4	0	0
121	57	High PNI	48	≤60 years	Han-Nationality	Married	Senior or Higher professional education	Staff medical insurance	Stage II	Postoperative radiotherapy	ECOG ≤2	No	No	Squamous cell carcinoma	No	93	100	100	83	100	83	100	100	100	0	100	67	67	100	100	20	0	0
122	56	High PNI	61	>60 years	non-Han-Nationality	Married	Senior or Higher professional education	Residents, new rural cooperative medical insurance	Stage II	Postoperative radiotherapy and chemotherapy	ECOG ≤2	Yes	No	Adenocarcinoma	No	93	100	100	50	100	67	100	100	100	100	100	100	33	100	100	24	0	0
123	60	High PNI	56	≤60 years	Han-Nationality	Married	University or postgraduate education	Other payments	Stage II	Postoperative radiotherapy	ECOG ≤2	No	No	Squamous cell carcinoma	No	93	50	58	100	83	100	100	100	100	100	0	100	100	100	0	19	0	0
124	56	High PNI	61	>60 years	non-Han-Nationality	Unmarried	Senior or Higher professional education	Staff medical insurance	Stage III	Concurrent chemoradiotherap	ECOG ≤2	No	No	Squamous cell carcinoma	No	100	67	100	83	83	100	67	100	100	100	100	100	100	100	100	18	0	1	CR
125	56	High PNI	59	≤60 years	Han-Nationality	Married	University or postgraduate education	Staff medical insurance	Stage II	Postoperative radiotherapy and chemotherapy	ECOG ≤2	Yes	No	Squamous cell carcinoma	No	87	83	92	83	100	100	100	100	100	100	100	100	100	100	33	8	0	0
126	56	High PNI	57	≤60 years	Han-Nationality	Married	University or postgraduate education	Staff medical insurance	Stage III	Postoperative radiotherapy	ECOG ≤2	No	No	Squamous cell carcinoma	No	100	100	100	100	67	100	11	100	100	100	100	100	100	100	100	13	0	0
127	61	High PNI	65	>60 years	Han-Nationality	Unmarried	Senior or Higher professional education	Staff medical insurance	Stage III	Postoperative radiotherapy	ECOG ≤2	No	No	Squamous cell carcinoma	No	100	100	67	100	67	100	100	100	100	100	100	100	100	100	100	21	0	0
129	49	High PNI	55	≤60 years	Han-Nationality	Unmarried	Senior or Higher professional education	Residents, new rural cooperative medical insurance	Stage II	Postoperative radiotherapy	ECOG ≤2	Yes	Yes	Squamous cell carcinoma	No	67	83	83	67	100	100	78	67	100	100	100	100	100	100	33	13	0	0
130	59	High PNI	54	≤60 years	Han-Nationality	Married	Senior or Higher professional education	Staff medical insurance	Stage II	Postoperative radiotherapy	ECOG ≤2	No	No	Squamous cell carcinoma	No	100	100	33	83	100	100	67	100	100	100	100	100	100	100	100	13	0	0
131	54	High PNI	62	>60 years	Han-Nationality	Married	University or postgraduate education	Staff medical insurance	Stage II	Concurrent chemoradiotherap	ECOG ≤2	Yes	No	Squamous cell carcinoma	No	100	50	75	17	100	100	100	100	67	100	100	100	100	100	33	16	0	1	CR
132	54	High PNI	48	≤60 years	Han-Nationality	Married	Senior or Higher professional education	Staff medical insurance	Stage II	Postoperative radiotherapy	ECOG ≤2	No	Yes	Squamous cell carcinoma	No	100	100	100	83	100	100	100	100	100	100	100	100	100	100	100	22	0	0
133	59	High PNI	52	≤60 years	Han-Nationality	Married	University or postgraduate education	Other payments	Stage II	Postoperative radiotherapy and chemotherapy	ECOG ≤2	Yes	No	Squamous cell carcinoma	No	100	83	75	83	100	92	100	100	100	100	100	100	67	100	100	21	0	0
134	56	High PNI	45	≤60 years	Han-Nationality	Married	University or postgraduate education	Other payments	Stage II	Postoperative radiotherapy and chemotherapy	ECOG ≤2	No	No	Squamous cell carcinoma	No	93	100	100	100	50	67	100	100	83	67	100	100	100	100	100	11	0	0
135	54	High PNI	63	>60 years	Han-Nationality	Married	University or postgraduate education	Residents, new rural cooperative medical insurance	Stage I	Postoperative radiotherapy and chemotherapy	ECOG ≤2	Yes	No	Squamous cell carcinoma	No	87	83	100	83	67	100	100	100	100	100	100	100	100	100	100	8	0	0
136	52	High PNI	60	≤60 years	non-Han-Nationality	Married	Primary or junior education	Self-pay	Stage IV	Postoperative radiotherapy	ECOG ≤2	No	No	Adenocarcinoma	Yes	93	83	83	100	83	100	100	100	100	100	100	100	100	100	100	9	0	0
138	57	High PNI	64	>60 years	Han-Nationality	Divorced	Senior or Higher professional education	Staff medical insurance	Stage IV	Concurrent chemoradiotherap	ECOG ≤2	Yes	No	Squamous cell carcinoma	No	80	100	83	100	67	75	100	83	100	100	100	100	100	100	100	17	0	1	CR
1	36	Low PNI	63	>60 years	Han-Nationality	Married	Senior or Higher professional education	Self-pay	Stage IV	Concurrent chemoradiotherap	ECOG ≤2	No	Yes	Adenocarcinoma	Yes	7	0	58	0	33	8	44	17	0	0	33	0	0	0	0	3	0	1	CR
3	39	Low PNI	60	≤60 years	Han-Nationality	Divorced	Senior or Higher professional education	Residents, new rural cooperative medical insurance	Stage III	Concurrent chemoradiotherap	ECOG >2	Yes	No	Squamous cell carcinoma	No	7	33	50	83	100	0	22	0	0	100	100	0	0	0	0	1	0	1	CR
4	48	Low PNI	62	>60 years	Han-Nationality	Married	Senior or Higher professional education	Other payments	Stage III	Concurrent chemoradiotherap	ECOG ≤2	No	No	Squamous cell carcinoma	No	53	0	33	33	0	17	56	33	0	100	33	33	0	0	0	23	0	1	PR
6	44	Low PNI	59	≤60 years	non-Han-Nationality	Married	Senior or Higher professional education	Self-pay	Stage IV	Concurrent chemoradiotherap	ECOG ≤2	Yes	No	Squamous cell carcinoma	Yes	0	67	17	0	83	25	11	0	0	0	0	0	0	0	33	9	1	1	PR
7	43	Low PNI	67	>60 years	Han-Nationality	Married	University or postgraduate education	Self-pay	Stage III	Concurrent chemoradiotherap	ECOG ≤2	Yes	No	Squamous cell carcinoma	No	27	17	8	33	17	50	100	50	0	67	0	0	100	0	100	1	0	1	CR
8	41	Low PNI	57	≤60 years	Han-Nationality	Married	Primary or junior education	Other payments	Stage III	Palliative radiotherapy	ECOG >2	Yes	No	Squamous cell carcinoma	No	13	0	67	50	100	33	56	17	0	0	0	0	0	0	33	6	1	1	SD
9	33	Low PNI	66	>60 years	Han-Nationality	Married	Senior or Higher professional education	Other payments	Stage III	Palliative radiotherapy	ECOG >2	No	Yes	Squamous cell carcinoma	No	20	33	0	67	50	17	44	17	17	0	100	33	33	0	0	1	0	1	PR
11	35	Low PNI	65	>60 years	Han-Nationality	Married	Senior or Higher professional education	Residents, new rural cooperative medical insurance	Stage IV	Postoperative radiotherapy and chemotherapy	ECOG ≤2	Yes	No	Squamous cell carcinoma	Yes	0	67	50	50	50	0	44	0	0	100	33	0	100	0	0	1	0	0
12	47	Low PNI	68	>60 years	Han-Nationality	Divorced	Primary or junior education	Other payments	Stage IV	Palliative radiotherapy	ECOG >2	No	No	Squamous cell carcinoma	Yes	27	33	17	17	17	25	44	0	0	0	0	0	33	33	0	17	0	1	CR
14	48	Low PNI	67	>60 years	Han-Nationality	Married	Senior or Higher professional education	Staff medical insurance	Stage II	Concurrent chemoradiotherap	ECOG ≤2	No	No	Squamous cell carcinoma	No	47	17	67	0	67	33	89	17	0	0	33	67	0	0	0	11	0	1	CR
15	36	Low PNI	56	≤60 years	Han-Nationality	Married	Primary or junior education	Self-pay	Stage II	Postoperative radiotherapy and chemotherapy	ECOG ≤2	Yes	Yes	Squamous cell carcinoma	No	13	67	8	0	67	8	11	0	17	0	33	0	100	0	0	8	0	0
17	45	Low PNI	66	>60 years	Han-Nationality	Married	Primary or junior education	Self-pay	Stage III	Postoperative radiotherapy	ECOG ≤2	Yes	No	Adenocarcinoma	No	47	83	42	33	100	0	67	0	0	100	0	0	100	0	0	1	0	0
19	48	Low PNI	66	>60 years	Han-Nationality	Divorced	Primary or junior education	Residents, new rural cooperative medical insurance	Stage III	Concurrent chemoradiotherap	ECOG ≤2	No	No	Squamous cell carcinoma	No	67	17	25	67	67	33	0	17	0	100	67	33	33	0	100	18	0	1	PR
21	43	Low PNI	61	>60 years	Han-Nationality	Unmarried	Primary or junior education	Staff medical insurance	Stage IV	Concurrent chemoradiotherap	ECOG >2	No	No	Adenocarcinoma	No	33	67	67	17	50	50	67	50	33	0	100	0	0	0	0	1	1	1	PR
22	42	Low PNI	52	≤60 years	Han-Nationality	Divorced	Senior or Higher professional education	Other payments	Stage IV	Postoperative radiotherapy and chemotherapy	ECOG ≤2	No	No	Squamous cell carcinoma	No	20	100	42	0	83	0	22	17	17	0	0	0	0	33	100	7	1	0
26	41	Low PNI	63	>60 years	non-Han-Nationality	Married	Primary or junior education	Self-pay	Stage III	Concurrent chemoradiotherap	ECOG >2	Yes	No	Squamous cell carcinoma	No	7	100	42	33	50	25	67	50	33	33	33	0	0	0	33	8	0	1	CR
27	43	Low PNI	59	≤60 years	Han-Nationality	Divorced	Senior or Higher professional education	Self-pay	Stage II	Palliative radiotherapy	ECOG >2	Yes	No	Squamous cell carcinoma	No	7	50	67	33	0	58	100	33	33	33	0	33	100	0	33	16	0	0
28	45	Low PNI	62	>60 years	Han-Nationality	Married	Primary or junior education	Residents, new rural cooperative medical insurance	Stage III	Concurrent chemoradiotherap	ECOG >2	No	No	Squamous cell carcinoma	No	67	50	25	67	17	92	100	50	33	0	33	33	100	67	0	18	0	1	SD
29	43	Low PNI	54	≤60 years	non-Han-Nationality	Divorced	Primary or junior education	Other payments	Stage III	Concurrent chemoradiotherap	ECOG >2	No	Yes	Squamous cell carcinoma	No	20	33	50	83	17	75	33	17	50	0	100	0	100	100	100	18	0	1	CR
31	44	Low PNI	72	>60 years	Han-Nationality	Married	Primary or junior education	Self-pay	Stage III	Postoperative radiotherapy and chemotherapy	ECOG ≤2	No	No	Squamous cell carcinoma	No	40	0	50	67	33	67	0	17	50	33	33	100	0	0	33	5	0	0
33	44	Low PNI	62	>60 years	Han-Nationality	Divorced	University or postgraduate education	Self-pay	Stage III	Concurrent chemoradiotherap	ECOG >2	Yes	Yes	Squamous cell carcinoma	No	33	50	75	33	0	50	0	0	33	100	100	100	33	0	100	5	0	1	CR
36	47	Low PNI	67	>60 years	Han-Nationality	Married	Primary or junior education	Staff medical insurance	Stage II	Palliative radiotherapy	ECOG >2	No	No	Adenocarcinoma	No	60	83	67	50	33	42	22	0	50	100	100	0	100	67	100	14	0	0
37	42	Low PNI	69	>60 years	Han-Nationality	Married	University or postgraduate education	Other payments	Stage I	Concurrent chemoradiotherap	ECOG >2	No	Yes	Adenosquamous carcinoma	No	60	17	67	100	17	50	0	0	17	33	0	100	100	0	100	1	0	1	CR
39	43	Low PNI	61	>60 years	non-Han-Nationality	Unmarried	University or postgraduate education	Residents, new rural cooperative medical insurance	Stage III	Concurrent chemoradiotherap	ECOG >2	No	No	Adenosquamous carcinoma	No	40	50	100	0	0	50	100	17	0	100	67	100	100	33	100	1	0	1	CR
41	44	Low PNI	69	>60 years	non-Han-Nationality	Married	Primary or junior education	Residents, new rural cooperative medical insurance	Stage IV	Concurrent chemoradiotherap	ECOG >2	Yes	No	Squamous cell carcinoma	Yes	47	50	75	50	100	25	11	67	100	67	0	100	33	0	100	13	1	1	SD
43	45	Low PNI	58	≤60 years	Han-Nationality	Married	University or postgraduate education	Residents, new rural cooperative medical insurance	Stage III	Postoperative radiotherapy	ECOG ≤2	No	No	Squamous cell carcinoma	No	87	17	25	83	100	25	22	17	100	0	100	100	0	33	33	5	0	0
47	35	Low PNI	61	>60 years	non-Han-Nationality	Married	Senior or Higher professional education	Other payments	Stage III	Postoperative radiotherapy and chemotherapy	ECOG ≤2	No	No	Adenocarcinoma	No	40	100	58	100	100	42	100	83	50	0	33	67	100	67	100	2	0	0
51	42	Low PNI	63	>60 years	Han-Nationality	Divorced	Senior or Higher professional education	Staff medical insurance	Stage III	Concurrent chemoradiotherap	ECOG >2	No	Yes	Adenocarcinoma	No	47	67	100	100	100	25	0	50	0	33	33	67	67	100	33	1	0	1	CR
52	44	Low PNI	49	≤60 years	Han-Nationality	Married	University or postgraduate education	Other payments	Stage III	Concurrent chemoradiotherap	ECOG ≤2	Yes	No	Squamous cell carcinoma	No	87	100	83	0	50	100	89	50	33	100	100	0	100	67	33	22	0	1	CR
55	48	Low PNI	63	>60 years	Han-Nationality	Divorced	Primary or junior education	Self-pay	Stage IV	Concurrent chemoradiotherap	ECOG ≤2	No	Yes	Adenocarcinoma	No	67	50	100	50	33	92	78	67	50	100	33	100	100	100	0	1	0	1	SD
58	42	Low PNI	56	≤60 years	Han-Nationality	Divorced	Senior or Higher professional education	Residents, new rural cooperative medical insurance	Stage II	Concurrent chemoradiotherap	ECOG >2	Yes	Yes	Squamous cell carcinoma	No	40	17	50	33	33	17	11	100	50	67	33	33	100	67	100	1	0	1	CR
61	48	Low PNI	65	>60 years	non-Han-Nationality	Married	Primary or junior education	Residents, new rural cooperative medical insurance	Stage I	Postoperative radiotherapy	ECOG ≤2	No	No	Squamous cell carcinoma	No	60	67	100	0	33	67	22	67	83	0	0	33	100	100	0	8	0	0
62	46	Low PNI	59	≤60 years	Han-Nationality	Married	Senior or Higher professional education	Residents, new rural cooperative medical insurance	Stage I	Postoperative radiotherapy	ECOG ≤2	No	No	Squamous cell carcinoma	No	60	83	25	100	100	67	67	67	50	100	33	67	100	33	100	2	1	0
65	47	Low PNI	57	≤60 years	Han-Nationality	Married	Primary or junior education	Other payments	Stage III	Concurrent chemoradiotherap	ECOG ≤2	No	No	Adenocarcinoma	No	27	50	8	100	0	100	100	67	67	33	0	100	100	100	33	13	1	1	SD
66	45	Low PNI	56	≤60 years	Han-Nationality	Married	Primary or junior education	Residents, new rural cooperative medical insurance	Stage IV	Palliative radiotherapy	ECOG >2	No	Yes	Adenosquamous carcinoma	Yes	73	67	25	100	17	25	22	67	50	0	100	100	100	67	100	7	0	0
67	47	Low PNI	61	>60 years	Han-Nationality	Married	Primary or junior education	Staff medical insurance	Stage I	Concurrent chemoradiotherap	ECOG ≤2	No	No	Squamous cell carcinoma	No	73	100	42	100	0	67	33	83	100	100	100	100	100	100	33	11	1	1	SD
68	46	Low PNI	57	≤60 years	Han-Nationality	Married	Primary or junior education	Self-pay	Stage III	Postoperative radiotherapy	ECOG ≤2	No	No	Squamous cell carcinoma	No	60	83	58	100	67	42	100	100	100	100	0	100	0	100	100	10	0	0
69	43	Low PNI	58	≤60 years	Han-Nationality	Married	Primary or junior education	Residents, new rural cooperative medical insurance	Stage II	Concurrent chemoradiotherap	ECOG ≤2	No	Yes	Squamous cell carcinoma	No	40	100	92	67	100	83	100	67	83	100	67	100	100	67	100	3	0	1	CR
77	44	Low PNI	63	>60 years	non-Han-Nationality	Married	University or postgraduate education	Residents, new rural cooperative medical insurance	Stage IV	Concurrent chemoradiotherap	ECOG ≤2	No	No	Squamous cell carcinoma	Yes	67	0	75	67	67	25	67	100	83	100	67	100	33	100	100	5	0	1	PR
82	45	Low PNI	55	≤60 years	Han-Nationality	Unmarried	Primary or junior education	Self-pay	Stage II	Concurrent chemoradiotherap	ECOG ≤2	No	No	Squamous cell carcinoma	No	80	100	100	100	67	75	33	100	67	100	0	100	100	100	100	1	1	1	PR
85	47	Low PNI	52	≤60 years	Han-Nationality	Married	University or postgraduate education	Residents, new rural cooperative medical insurance	Stage IV	Concurrent chemoradiotherap	ECOG ≤2	Yes	Yes	Squamous cell carcinoma	No	53	50	58	50	67	100	22	50	50	67	100	100	100	100	100	5	0	1	PR
86	48	Low PNI	54	≤60 years	Han-Nationality	Divorced	Primary or junior education	Self-pay	Stage II	Concurrent chemoradiotherap	ECOG >2	No	No	Squamous cell carcinoma	No	67	100	50	83	100	75	56	100	83	100	100	100	33	67	100	8	0	1	PR
88	48	Low PNI	54	≤60 years	Han-Nationality	Divorced	University or postgraduate education	Other payments	Stage II	Postoperative radiotherapy	ECOG ≤2	No	No	Adenocarcinoma	No	60	67	75	50	100	17	56	83	100	100	33	100	100	0	100	23	0	0
89	41	Low PNI	56	≤60 years	non-Han-Nationality	Married	University or postgraduate education	Staff medical insurance	Stage III	Concurrent chemoradiotherap	ECOG ≤2	No	Yes	Squamous cell carcinoma	No	67	33	100	17	67	100	44	100	100	100	67	33	67	100	100	1	0	1	CR
100	43	Low PNI	62	>60 years	Han-Nationality	Married	Senior or Higher professional education	Residents, new rural cooperative medical insurance	Stage II	Postoperative radiotherapy and chemotherapy	ECOG ≤2	No	No	Squamous cell carcinoma	No	93	67	100	67	0	50	67	100	67	33	100	100	0	100	33	7	0	0
104	46	Low PNI	56	≤60 years	Han-Nationality	Married	Primary or junior education	Self-pay	Stage II	Postoperative radiotherapy	ECOG ≤2	No	No	Squamous cell carcinoma	No	87	83	100	100	83	100	11	100	100	100	100	100	33	67	33	20	0	0
111	47	Low PNI	56	≤60 years	Han-Nationality	Unmarried	Senior or Higher professional education	Staff medical insurance	Stage II	Postoperative radiotherapy and chemotherapy	ECOG ≤2	No	No	Adenosquamous carcinoma	No	93	100	100	100	83	100	89	83	100	67	100	67	100	100	100	11	0	0
116	48	Low PNI	61	>60 years	Han-Nationality	Married	University or postgraduate education	Other payments	Stage IV	Postoperative radiotherapy	ECOG ≤2	No	No	Adenocarcinoma	No	100	33	92	100	100	100	44	100	100	100	100	100	0	100	100	7	0	0
118	48	Low PNI	67	>60 years	non-Han-Nationality	Married	University or postgraduate education	Staff medical insurance	Stage II	Postoperative radiotherapy	ECOG ≤2	No	No	Squamous cell carcinoma	No	87	100	75	100	83	83	89	67	100	100	33	100	0	100	100	1	0	0
128	42	Low PNI	56	≤60 years	Han-Nationality	Married	Primary or junior education	Other payments	Stage I	Concurrent chemoradiotherap	ECOG >2	No	No	Squamous cell carcinoma	No	93	83	100	100	100	100	56	100	100	67	100	100	100	100	100	11	1	1	PR
137	45	Low PNI	48	≤60 years	Han-Nationality	Married	Senior or Higher professional education	Staff medical insurance	Stage I	Concurrent chemoradiotherap	ECOG ≤2	No	No	Squamous cell carcinoma	No	100	100	100	83	100	83	100	100	100	100	100	100	67	100	100	15	0	1	CR
